# Supplementary material for: Toward the low actuation temperature of flexible shape memory polymer composites with room temperature deformabilityviainduced plasticizing effect
Source: Royal Society of Chemistry journal article supplement (doi:10.1039/c7tb02068f), 2017-01-01
Supplement: c7tb02068f1.pdf [file c7tb02068f1.pdf]

**Supplementary: Shape recovery of PLA/TPU/PEG composites under two different temperature conditions.**

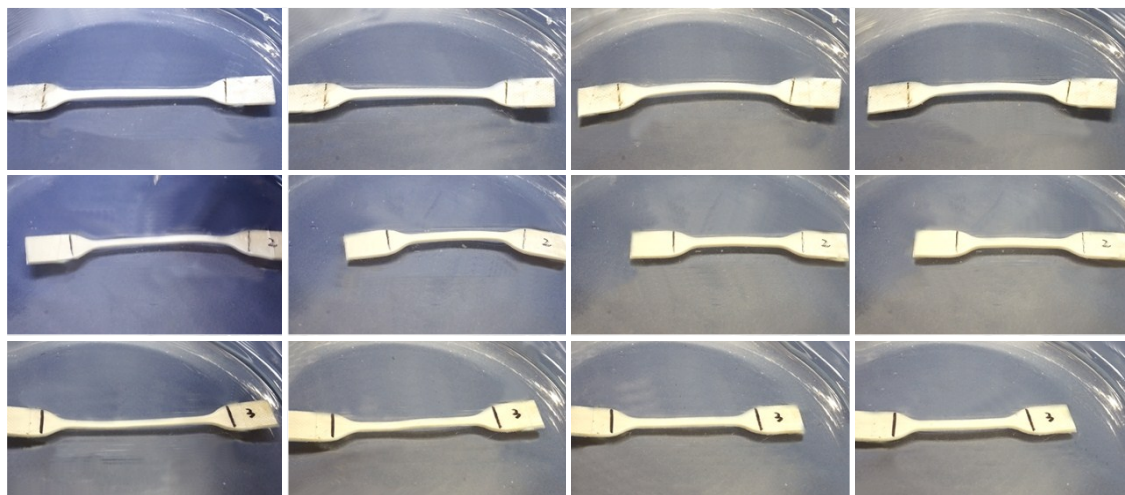

Figure 1 –Shape recovery of PLA/TPU/PEG composites in 50°C water bath: top to bottom: 0, 10, 20 wt% PEG; left to right: 0 , 5, 10, 20 seconds

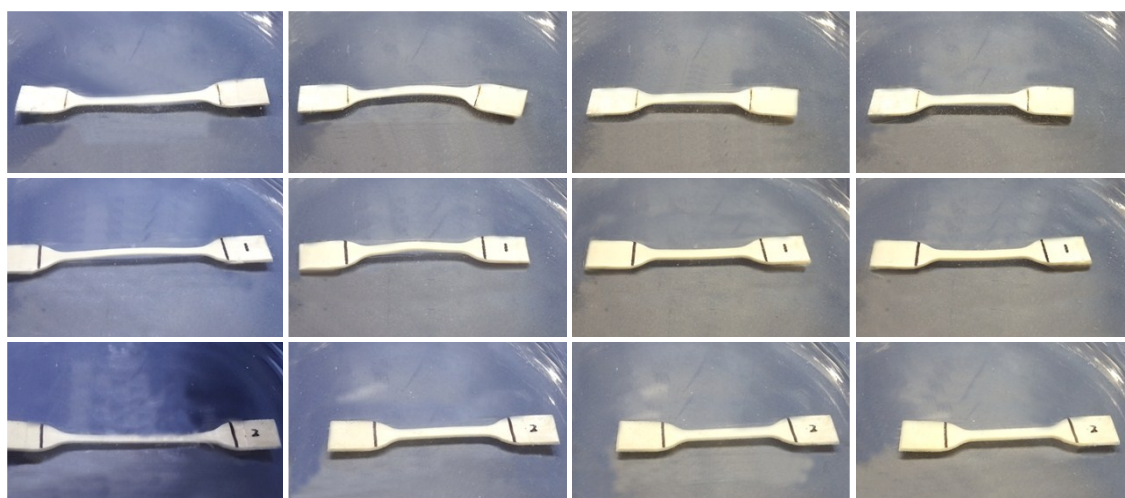

Figure 2 – Shape recovery of PLA/TPU/PEG composites in 70°C water bath: top to bottom: 0, 10, 20 wt% PEG; left to right: 0 , 5, 10, 20 seconds
